# Supplementary material for: Semaphorin-7A on Exosomes: A Promigratory Signal in the Glioma Microenvironment
Source: PubMed Central journal article supplement (PMC6628148; doi:10.3390/cancers11060758), 2019-05-30
Supplement: cancers-11-00758-s001.pdf [file cancers-11-00758-s001.pdf]

## Supplementary materials

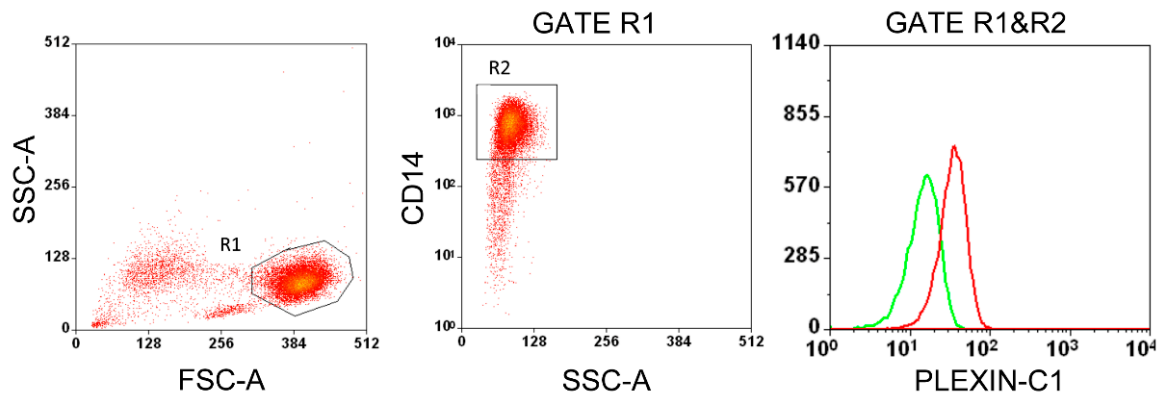

**Figure S1.** Representative Flow Cytometry analysis showing the level of Plexin C1 on the surface of human monocytes.

**Table S1.** Proteins extracted from 30  $\mu$ g exosomes derived from the sample S-82 and identified by LC-MS/MS analyses.

| F  | DB | Accession   | S    | N<br>M | S82-band 1-Description                                                   |
|----|----|-------------|------|--------|--------------------------------------------------------------------------|
| 1  | N  | NP_002017.1 | 1987 | 66     | "fibronectin isoform 3 preproprotein [Homo sapiens]"                     |
| 2  | S  | PGS1_HUMAN  | 630  | 19     | "Biglycan OS=Homo sapiens OX=9606 GN=BGN PE=1 SV=2"                      |
| 2  | N  | EAW72861.1  | 510  | 17     | "biglycan isoform CRA_a [Homo sapiens]"                                  |
| 3  | S  | CO6A1_HUMAN | 473  | 15     | "Collagen alpha-1(VI) chain OS=Homo sapiens OX=9606 GN=COL6A1 PE=1 SV=3" |
| 4  | S  | TARSH_HUMAN | 362  | 10     | "Target of Nesh-SH3 OS=Homo sapiens OX=9606 GN=ABI3BP PE=1 SV=1"         |
| 5  | N  | AAB94054.3  | 333  | 12     | "pro alpha 1(I) collagen [Homo sapiens]"                                 |
| 5  | N  | AAA51995.1  | 282  | 11     | "alpha 1 (I) chain propeptide partial [Homo sapiens]"                    |
| 6  | N  | CAH56139.1  | 273  | 7      | "hypothetical protein partial [Homo sapiens]"                            |
| 7  | S  | A2MG_HUMAN  | 153  | 4      | "Alpha-2-macroglobulin OS=Homo sapiens OX=9606 GN=A2M PE=1 SV=3"         |
| 8  | S  | ALBU_HUMAN  | 124  | 4      | "Serum albumin OS=Homo sapiens OX=9606 GN=ALB PE=1 SV=2"                 |
| 9  | S  | LAMC1_HUMAN | 102  | 2      | "Laminin subunit gamma-1 OS=Homo sapiens OX=9606 GN=LAMC1 PE=1 SV=3"     |
| 10 | N  | CAA23761.1  | 100  | 2      | "unnamed protein product partial [Homo sapiens]"                         |
| 11 | S  | FLNB_HUMAN  | 88   | 1      | "Filamin-B OS=Homo sapiens OX=9606 GN=FLNB PE=1 SV=2"                    |
| 12 | S  | VIME_HUMAN  | 83   | 1      | "Vimentin OS=Homo sapiens OX=9606 GN=VIM PE=1 SV=4"                      |
| 13 | S  | LAMB1_HUMAN | 67   | 1      | "Laminin subunit beta-1 OS=Homo sapiens OX=9606 GN=LAMB1 PE=1 SV=2"      |
| 14 | S  | HEMO_HUMAN  | 60   | 3      | "Hemopexin OS=Homo sapiens OX=9606 GN=HPX PE=1 SV=2"                     |

| AN |    |                |      |    |   |                                                                                                       |
|----|----|----------------|------|----|---|-------------------------------------------------------------------------------------------------------|
| F  | DB | Accession      | S    | N  | M | S82-band 2-Description                                                                                |
| 15 | S  | TRFE_HUMAN     | 55   | 2  |   | "Serotransferrin OS=Homo sapiens OX=9606 GN=TF PE=1 SV=3"                                             |
| 16 | S  | GPC1_HUMAN     | 53   | 2  |   | "Glypican-1 OS=Homo sapiens OX=9606 GN=GPC1 PE=1 SV=2"                                                |
| 17 | S  | PTX3_HUMAN     | 49   | 1  |   | "Pentraxin-related protein PTX3 OS=Homo sapiens OX=9606 GN=PTX3 PE=1 SV=3"                            |
| 18 | S  | AMD_HUMAN      | 47   | 1  |   | "Peptidyl-glycine alpha-amidating monooxygenase OS=Homo sapiens OX=9606 GN=PAM PE=1 SV=2"             |
| 19 | N  | SJM31191.1     | 46   | 3  |   | "Sulfotransferase [Homo sapiens]"                                                                     |
| 20 | N  | AAA52002.1     | 46   | 1  |   | "alpha-1 type III collagen partial [Homo sapiens]"                                                    |
| 21 | N  | AAA53376.1     | 41   | 1  |   | "fibronectin partial [Homo sapiens]"                                                                  |
| 22 | S  | TLN1_HUMAN     | 32   | 1  |   | "Talin-1 OS=Homo sapiens OX=9606 GN=TLN1 PE=1 SV=3"                                                   |
| 23 | N  | AKD42826.1     | 29   | 1  |   | "anti-HIV-1 immunoglobulin light chain variable region partial [Homo sapiens]"                        |
| 24 | S  | PLTP_HUMAN     | 25   | 1  |   | "Phospholipid transfer protein OS=Homo sapiens OX=9606 GN=PLTP PE=1 SV=1"                             |
| 25 | S  | UAP1L_HUMAN    | 19   | 1  |   | "UDP-N-acetylhexosamine pyrophosphorylase-like protein 1 OS=Homo sapiens OX=9606 GN=UAP1L1 PE=1 SV=2" |
| 1  | S  | CO6A1_HUMAN    | 2520 | 81 |   | "Collagen alpha-1(VI) chain OS=Homo sapiens OX=9606 GN=COL6A1 PE=1 SV=3"                              |
| 2  | N  | XP_005257115.2 | 720  | 19 |   | "collagen alpha-1(I) chain isoform X2 [Homo sapiens]"                                                 |
| 3  | N  | CAA23761.1     | 356  | 13 |   | "unnamed protein product partial [Homo sapiens]"                                                      |
| 4  | S  | CO6A2_HUMAN    | 311  | 12 |   | "Collagen alpha-2(VI) chain OS=Homo sapiens OX=9606 GN=COL6A2 PE=1 SV=4"                              |
| 5  | N  | NP_002017.1    | 191  | 5  |   | "fibronectin isoform 3 preproprotein [Homo sapiens]"                                                  |
| 6  | N  | XP_024301816.1 | 157  | 3  |   | "alpha-mannosidase 2 isoform X2 [Homo sapiens]"                                                       |
| 7  | S  | PGS1_HUMAN     | 122  | 3  |   | "Biglycan OS=Homo sapiens OX=9606 GN=BGN PE=1 SV=2"                                                   |
| 8  | S  | VINC_HUMAN     | 121  | 3  |   | "Vinculin OS=Homo sapiens OX=9606 GN=VCL PE=1 SV=4"                                                   |
| 9  | S  | SPTN1_HUMAN    | 92   | 3  |   | "Spectrin alpha chain non-erythrocytic 1 OS=Homo sapiens OX=9606 GN=SPTAN1 PE=1 SV=3"                 |
| 10 | S  | ALBU_HUMAN     | 89   | 3  |   | "Serum albumin OS=Homo sapiens OX=9606 GN=ALB PE=1 SV=2"                                              |
| 11 | S  | PLTP_HUMAN     | 73   | 1  |   | "Phospholipid transfer protein OS=Homo sapiens OX=9606 GN=PLTP PE=1 SV=1"                             |
| 12 | S  | ACTN1_HUMAN    | 65   | 1  |   | "Alpha-actinin-1 OS=Homo sapiens OX=9606 GN=ACTN1 PE=1 SV=2"                                          |

|          |           |                  |          |                      |                                                                                                               |
|----------|-----------|------------------|----------|----------------------|---------------------------------------------------------------------------------------------------------------|
| 13       | S         | IPO5_HUMAN       | 64       | 1                    | "Importin-5 OS=Homo sapiens OX=9606 GN=IPO5 PE=1 SV=4"                                                        |
| 14       | N         | AAB28324.1       | 49       | 1                    | "beta-fodrin partial [Homo sapiens]"                                                                          |
| 15       | N         | AAA52016.1       | 48       | 1                    | "complement H factor partial [Homo sapiens]"                                                                  |
| 16       | S         | A4_HUMAN         | 48       | 1                    | "Amyloid-beta A4 protein OS=Homo sapiens OX=9606 GN=APP PE=1 SV=3"                                            |
| 17       | N         | SJM28484.1       | 47       | 1                    | "Adenosylhomocysteinase [Homo sapiens]"                                                                       |
| 18       | S         | TRFE_HUMAN       | 47       | 1                    | "Serotransferrin OS=Homo sapiens OX=9606 GN=TF PE=1 SV=3"                                                     |
| 19       | S         | A2MG_HUMAN       | 41       | 1                    | "Alpha-2-macroglobulin OS=Homo sapiens OX=9606 GN=A2M PE=1 SV=3"                                              |
| 20       | S         | ENPP2_HUMAN      | 36       | 1                    | "Ectonucleotide pyrophosphatase/phosphodiesterase family member 2 OS=Homo sapiens OX=9606 GN=ENPP2 PE=1 SV=3" |
| 21       | N         | AAA52002.1       | 35       | 1                    | "alpha-1 type III collagen partial [Homo sapiens]"                                                            |
| 22       | N         | SJM35999.1       | 33       | 1                    | "Trehalose/maltose import ATP-binding protein MalK [Homo sapiens]"                                            |
| 23       | S         | CSTN1_HUMAN      | 31       | 1                    | "Calsyntenin-1 OS=Homo sapiens OX=9606 GN=CLSTN1 PE=1 SV=1"                                                   |
| 24       | S         | PROM2_HUMAN      | 30       | 1                    | "Prominin-2 OS=Homo sapiens OX=9606 GN=PROM2 PE=1 SV=1"                                                       |
| 25       | N         | CAE45795.1       | 28       | 1                    | "hypothetical protein partial [Homo sapiens]"                                                                 |
| 26       | S         | AMPQ_HUMAN       | 24       | 1                    | "Aminopeptidase Q OS=Homo sapiens OX=9606 GN=LVRN PE=1 SV=4"                                                  |
| 27       | N         | SJM31191.1       | 24       | 1                    | "Sulfotransferase [Homo sapiens]"                                                                             |
| 28       | N         | XP_024308106.1   | 23       | 1                    | "uracil phosphoribosyltransferase homolog isoform X1 [Homo sapiens]"                                          |
| <b>F</b> | <b>DB</b> | <b>Accession</b> | <b>S</b> | <b>N</b><br><b>M</b> | <b>S82-band 3-Description</b>                                                                                 |
| 1        | S         | TRFE_HUMAN       | 741      | 31                   | "Serotransferrin OS=Homo sapiens OX=9606 GN=TF PE=1 SV=3"                                                     |
| 2        | S         | QSOX1_HUMAN      | 468      | 15                   | "Sulfhydryl oxidase 1 OS=Homo sapiens OX=9606 GN=QSOX1 PE=1 SV=3"                                             |
| 3        | S         | CO6A1_HUMAN      | 419      | 14                   | "Collagen alpha-1(VI) chain OS=Homo sapiens OX=9606 GN=COL6A1 PE=1 SV=3"                                      |
| 4        | S         | ACTN4_HUMAN      | 403      | 12                   | "Alpha-actinin-4 OS=Homo sapiens OX=9606 GN=ACTN4 PE=1 SV=2"                                                  |
| 4        | N         | ACJ24535.1       | 333      | 9                    | "actinin alpha 1 isoform 3 [Homo sapiens]"                                                                    |
| 5        | S         | LG3BP_HUMAN      | 387      | 23                   | "Galectin-3-binding protein OS=Homo sapiens OX=9606 GN=LGALS3BP PE=1 SV=1"                                    |
| 6        | S         | PLTP_HUMAN       | 229      | 7                    | "Phospholipid transfer protein OS=Homo sapiens OX=9606 GN=PLTP PE=1 SV=1"                                     |
| 7        | S         | SCG2_HUMAN       | 214      | 10                   | "Secretogranin-2 OS=Homo sapiens OX=9606 GN=SCG2 PE=1 SV=2"                                                   |
| 8        | S         | BIP_HUMAN        | 166      | 4                    | "Endoplasmic reticulum chaperone BiP OS=Homo sapiens OX=9606 GN=HSPA5 PE=1 SV=2"                              |

|          |           |                  |          |                      |                                                                                                                 |
|----------|-----------|------------------|----------|----------------------|-----------------------------------------------------------------------------------------------------------------|
| 9        | N         | AAC34741.1       | 153      | 5                    | "semaphorin L partial [Homo sapiens]"                                                                           |
| 10       | N         | XP_005257115.2   | 151      | 4                    | "collagen alpha-1(I) chain isoform X2 [Homo sapiens]"                                                           |
| 11       | S         | LUM_HUMAN        | 140      | 2                    | "Lumican OS=Homo sapiens OX=9606 GN=LUM PE=1 SV=2"                                                              |
| 12       | S         | C1S_HUMAN        | 130      | 2                    | "Complement C1s subcomponent OS=Homo sapiens OX=9606 GN=C1S PE=1 SV=1"                                          |
| 13       | N         | CAA23761.1       | 126      | 3                    | "unnamed protein product partial [Homo sapiens]"                                                                |
| 14       | N         | AAH23006.2       | 115      | 5                    | "HSP90AA1 protein partial [Homo sapiens]"                                                                       |
| 15       | S         | PGS1_HUMAN       | 111      | 2                    | "Biglycan OS=Homo sapiens OX=9606 GN=BGN PE=1 SV=2"                                                             |
| 16       | S         | ALBU_HUMAN       | 97       | 4                    | "Serum albumin OS=Homo sapiens OX=9606 GN=ALB PE=1 SV=2"                                                        |
| 17       | S         | MOES_HUMAN       | 96       | 4                    | "Moesin OS=Homo sapiens OX=9606 GN=MSN PE=1 SV=3"                                                               |
| 18       | S         | PTX3_HUMAN       | 74       | 1                    | "Pentraxin-related protein PTX3 OS=Homo sapiens OX=9606 GN=PTX3 PE=1 SV=3"                                      |
| 19       | S         | CO6A2_HUMAN      | 66       | 2                    | "Collagen alpha-2(VI) chain OS=Homo sapiens OX=9606 GN=COL6A2 PE=1 SV=4"                                        |
| 20       | S         | FINC_HUMAN       | 60       | 2                    | "Fibronectin OS=Homo sapiens OX=9606 GN=FN1 PE=1 SV=4"                                                          |
| 21       | S         | C1R_HUMAN        | 57       | 2                    | "Complement C1r subcomponent OS=Homo sapiens OX=9606 GN=C1R PE=1 SV=2"                                          |
| 22       | N         | EAW68718.1       | 54       | 2                    | "hemopexin isoform CRA_a [Homo sapiens]"                                                                        |
| 23       | N         | AAB05933.1       | 50       | 2                    | "extracellular matrix protein 1 [Homo sapiens]"                                                                 |
| 24       | S         | BGH3_HUMAN       | 51       | 1                    | "Transforming growth factor-beta-induced protein ig-h3 OS=Homo sapiens OX=9606 GN=TGFB1 PE=1 SV=1"              |
| 25       | S         | EF2_HUMAN        | 50       | 1                    | "Elongation factor 2 OS=Homo sapiens OX=9606 GN=EEF2 PE=1 SV=4"                                                 |
| 26       | S         | EKI1_HUMAN       | 46       | 1                    | "Ethanolamine kinase 1 OS=Homo sapiens OX=9606 GN=ETNK1 PE=1 SV=1"                                              |
| 27       | S         | ENPL_HUMAN       | 42       | 1                    | "Endoplasmin OS=Homo sapiens OX=9606 GN=HSP90B1 PE=1 SV=1"                                                      |
| 28       | S         | PLOD1_HUMAN      | 40       | 2                    | "Procollagen-lysine-2-oxoglutarate 5-dioxygenase 1 OS=Homo sapiens OX=9606 GN=PLOD1 PE=1 SV=2"                  |
| 29       | N         | ACE74969.1       | 38       | 1                    | "immunoglobulin heavy chain variable region partial [Homo sapiens]"                                             |
| 30       | S         | FBLN1_HUMAN      | 37       | 1                    | "Fibulin-1 OS=Homo sapiens OX=9606 GN=FBLN1 PE=1 SV=4"                                                          |
| 31       | N         | SJM31191.1       | 37       | 1                    | "Sulfotransferase [Homo sapiens]"                                                                               |
| 32       | S         | PTK7_HUMAN       | 28       | 1                    | "Inactive tyrosine-protein kinase 7 OS=Homo sapiens OX=9606 GN=PTK7 PE=1 SV=2"                                  |
| 33       | N         | EAW60825.1       | 24       | 1                    | "signal transducer and activator of transcription 3 (acute-phase response factor) isoform CRA_f [Homo sapiens]" |
| 34       | S         | MEF2A_HUMAN      | 19       | 1                    | "Myocyte-specific enhancer factor 2A OS=Homo sapiens OX=9606 GN=MEF2A PE=1 SV=1"                                |
| <b>F</b> | <b>DB</b> | <b>Accession</b> | <b>S</b> | <b>N</b><br><b>M</b> | <b>S82-band 4-Description</b>                                                                                   |

|    |   |             |     |    |                                                                                                               |
|----|---|-------------|-----|----|---------------------------------------------------------------------------------------------------------------|
| 1  | S | BGH3_HUMAN  | 675 | 20 | "Transforming growth factor-beta-induced protein ig-h3 OS=Homo sapiens OX=9606 GN=TGFB1 PE=1 SV=1"            |
| 2  | S | ALBU_HUMAN  | 462 | 18 | "Serum albumin OS=Homo sapiens OX=9606 GN=ALB PE=1 SV=2"                                                      |
| 3  | S | CO6A1_HUMAN | 309 | 11 | "Collagen alpha-1(VI) chain OS=Homo sapiens OX=9606 GN=COL6A1 PE=1 SV=3"                                      |
| 4  | S | NUCB1_HUMAN | 284 | 10 | "Nucleobindin-1 OS=Homo sapiens OX=9606 GN=NUCB1 PE=1 SV=4"                                                   |
| 5  | S | HEMO_HUMAN  | 241 | 9  | "Hemopexin OS=Homo sapiens OX=9606 GN=HPX PE=1 SV=2"                                                          |
| 6  | S | MMP2_HUMAN  | 189 | 5  | "72 kDa type IV collagenase OS=Homo sapiens OX=9606 GN=MMP2 PE=1 SV=2"                                        |
| 7  | S | LUM_HUMAN   | 147 | 3  | "Lumican OS=Homo sapiens OX=9606 GN=LUM PE=1 SV=2"                                                            |
| 8  | S | TRFE_HUMAN  | 146 | 5  | "Serotransferrin OS=Homo sapiens OX=9606 GN=TF PE=1 SV=3"                                                     |
| 9  | N | BAG64863.1  | 136 | 3  | "unnamed protein product [Homo sapiens]"                                                                      |
| 10 | N | CAA23761.1  | 125 | 3  | "unnamed protein product partial [Homo sapiens]"                                                              |
| 11 | S | MOES_HUMAN  | 90  | 3  | "Moesin OS=Homo sapiens OX=9606 GN=MSN PE=1 SV=3"                                                             |
| 12 | N | NP_000079.2 | 90  | 2  | "collagen alpha-1(I) chain preproprotein [Homo sapiens]"                                                      |
| 13 | N | BAH11999.1  | 86  | 1  | "unnamed protein product [Homo sapiens]"                                                                      |
| 14 | N | SJM31191.1  | 81  | 8  | "Sulfotransferase [Homo sapiens]"                                                                             |
| 15 | S | SAP_HUMAN   | 71  | 1  | "Prosaposin OS=Homo sapiens OX=9606 GN=PSAP PE=1 SV=2"                                                        |
| 16 | S | KPYM_HUMAN  | 69  | 1  | "Pyruvate kinase PKM OS=Homo sapiens OX=9606 GN=PKM PE=1 SV=4"                                                |
| 17 | S | SCG2_HUMAN  | 68  | 3  | "Secretogranin-2 OS=Homo sapiens OX=9606 GN=SCG2 PE=1 SV=2"                                                   |
| 18 | S | PDIA3_HUMAN | 65  | 2  | "Protein disulfide-isomerase A3 OS=Homo sapiens OX=9606 GN=PDIA3 PE=1 SV=4"                                   |
| 19 | S | ISLR_HUMAN  | 52  | 2  | "Immunoglobulin superfamily containing leucine-rich repeat protein OS=Homo sapiens OX=9606 GN=ISLR PE=2 SV=1" |
| 20 | S | CO3A1_HUMAN | 47  | 1  | "Collagen alpha-1(III) chain OS=Homo sapiens OX=9606 GN=COL3A1 PE=1 SV=4"                                     |
| 21 | S | OLFL3_HUMAN | 45  | 2  | "Olfactomedin-like protein 3 OS=Homo sapiens OX=9606 GN=OLFML3 PE=2 SV=1"                                     |
| 22 | S | TSSK4_HUMAN | 41  | 1  | "Testis-specific serine/threonine-protein kinase 4 OS=Homo sapiens OX=9606 GN=TSSK4 PE=1 SV=1"                |
| 23 | S | CH60_HUMAN  | 41  | 1  | "60 kDa heat shock protein mitochondrial OS=Homo sapiens OX=9606 GN=HSPD1 PE=1 SV=2"                          |
| 24 | S | PTX3_HUMAN  | 37  | 1  | "Pentraxin-related protein PTX3 OS=Homo sapiens OX=9606 GN=PTX3 PE=1 SV=3"                                    |
| 25 | S | ANT3_HUMAN  | 36  | 1  | "Antithrombin-III OS=Homo sapiens OX=9606 GN=SERPINC1 PE=1 SV=1"                                              |

|          |           |                  |          |                      |                                                                                                               |
|----------|-----------|------------------|----------|----------------------|---------------------------------------------------------------------------------------------------------------|
| 26       | N         | NP_001333184.1   | 31       | 1                    | "ubiquitin carboxyl-terminal hydrolase 28 isoform f [Homo sapiens]"                                           |
| 27       | S         | PLTP_HUMAN       | 30       | 1                    | "Phospholipid transfer protein OS=Homo sapiens OX=9606 GN=PLTP PE=1 SV=1"                                     |
| 28       | N         | AAH21119.1       | 29       | 1                    | "GAPVD1 protein [Homo sapiens]"                                                                               |
| 29       | N         | AAQ62468.1       | 28       | 1                    | "thioredoxin reductase 1 partial [Homo sapiens]"                                                              |
| 30       | N         | AAA52018.1       | 25       | 1                    | "chromogranin A [Homo sapiens]"                                                                               |
| 31       | S         | CAD23_HUMAN      | 25       | 1                    | "Cadherin-23 OS=Homo sapiens OX=9606 GN=CDH23 PE=1 SV=2"                                                      |
| 32       | S         | MCPH1_HUMAN      | 24       | 1                    | "Microcephalin OS=Homo sapiens OX=9606 GN=MCPH1 PE=1 SV=4"                                                    |
| 33       | S         | CD109_HUMAN      | 23       | 1                    | "CD109 antigen OS=Homo sapiens OX=9606 GN=CD109 PE=1 SV=2"                                                    |
| 34       | S         | DYN3_HUMAN       | 22       | 1                    | "Dynamin-3 OS=Homo sapiens OX=9606 GN=DNM3 PE=1 SV=4"                                                         |
| 35       | N         | SJM33335.1       | 20       | 1                    | "Cytochrome P450 [Homo sapiens]"                                                                              |
| 36       | S         | CO3_HUMAN        | 20       | 1                    | "Complement C3 OS=Homo sapiens OX=9606 GN=C3 PE=1 SV=2"                                                       |
| <b>F</b> | <b>DB</b> | <b>Accession</b> | <b>S</b> | <b>N</b><br><b>M</b> | <b>S82-band 5-Description</b>                                                                                 |
| 1        | S         | PAI1_HUMAN       | 1624     | 44                   | "Plasminogen activator inhibitor 1 OS=Homo sapiens OX=9606 GN=SERPINE1 PE=1 SV=1"                             |
| 2        | S         | ACTB_HUMAN       | 350      | 16                   | "Actin cytoplasmic 1 OS=Homo sapiens OX=9606 GN=ACTB PE=1 SV=1"                                               |
| 3        | S         | PTX3_HUMAN       | 304      | 8                    | "Pentraxin-related protein PTX3 OS=Homo sapiens OX=9606 GN=PTX3 PE=1 SV=3"                                    |
| 4        | N         | NP_000079.2      | 245      | 6                    | "collagen alpha-1(I) chain preproprotein [Homo sapiens]"                                                      |
| 5        | S         | ISLR_HUMAN       | 220      | 6                    | "Immunoglobulin superfamily containing leucine-rich repeat protein OS=Homo sapiens OX=9606 GN=ISLR PE=2 SV=1" |
| 6        | S         | TRFE_HUMAN       | 197      | 7                    | "Serotransferrin OS=Homo sapiens OX=9606 GN=TF PE=1 SV=3"                                                     |
| 7        | S         | ENOA_HUMAN       | 183      | 3                    | "Alpha-enolase OS=Homo sapiens OX=9606 GN=ENO1 PE=1 SV=2"                                                     |
| 8        | S         | ALBU_HUMAN       | 178      | 5                    | "Serum albumin OS=Homo sapiens OX=9606 GN=ALB PE=1 SV=2"                                                      |
| 9        | S         | HEMO_HUMAN       | 167      | 6                    | "Hemopexin OS=Homo sapiens OX=9606 GN=HPX PE=1 SV=2"                                                          |
| 10       | S         | SPRC_HUMAN       | 140      | 7                    | "SPARC OS=Homo sapiens OX=9606 GN=SPARC PE=1 SV=1"                                                            |
| 11       | S         | ALDOA_HUMAN      | 132      | 4                    | "Fructose-bisphosphate aldolase A OS=Homo sapiens OX=9606 GN=ALDOA PE=1 SV=2"                                 |
| 12       | S         | CO6A1_HUMAN      | 121      | 3                    | "Collagen alpha-1(VI) chain OS=Homo sapiens OX=9606 GN=COL6A1 PE=1 SV=3"                                      |
| 13       | S         | VIME_HUMAN       | 117      | 4                    | "Vimentin OS=Homo sapiens OX=9606 GN=VIM PE=1 SV=4"                                                           |

|          |           |                  |          |          |                                                                                         |
|----------|-----------|------------------|----------|----------|-----------------------------------------------------------------------------------------|
|          |           | N                |          |          |                                                                                         |
| 13       | N         | AAA61281.2       | 112      | 4        | "vimentin partial [Homo sapiens]"                                                       |
| 14       | N         | CAA23761.1       | 109      | 4        | "unnamed protein product partial [Homo sapiens]"                                        |
| 15       | N         | AAA52002.1       | 104      | 2        | "alpha-1 type III collagen partial [Homo sapiens]"                                      |
| 16       | S         | FSTL1_HUMAN      | 92       | 3        | "Follistatin-related protein 1 OS=Homo sapiens OX=9606 GN=FSTL1 PE=1 SV=1"              |
| 17       | N         | AAX62798.1       | 82       | 2        | "aberrant LSLCL [Homo sapiens]"                                                         |
| 18       | S         | PCOC1_HUMAN      | 76       | 3        | "Procollagen C-endopeptidase enhancer 1 OS=Homo sapiens OX=9606 GN=PCOLCE PE=1 SV=2"    |
| 19       | S         | FINC_HUMAN       | 72       | 1        | "Fibronectin OS=Homo sapiens OX=9606 GN=FN1 PE=1 SV=4"                                  |
| 20       | S         | TGFB2_HUMAN      | 65       | 1        | "Transforming growth factor beta-2 OS=Homo sapiens OX=9606 GN=TGFB2 PE=1 SV=1"          |
| 21       | S         | SPI2_HUMAN       | 63       | 3        | "Serpine I2 OS=Homo sapiens OX=9606 GN=SERPINI2 PE=1 SV=1"                              |
| 22       | S         | CBPA4_HUMAN      | 51       | 1        | "Carboxypeptidase A4 OS=Homo sapiens OX=9606 GN=CPA4 PE=1 SV=2"                         |
| 23       | S         | LRC40_HUMAN      | 36       | 1        | "Leucine-rich repeat-containing protein 40 OS=Homo sapiens OX=9606 GN=LRRC40 PE=1 SV=1" |
| 24       | N         | CAD38944.1       | 35       | 1        | "hypothetical protein partial [Homo sapiens]"                                           |
| 25       | N         | XP_016875684.1   | 31       | 1        | "ubiquitin-protein ligase E3B isoform X5 [Homo sapiens]"                                |
| 26       | S         | MMP1_HUMAN       | 23       | 1        | "Interstitial collagenase OS=Homo sapiens OX=9606 GN=MMP1 PE=1 SV=3"                    |
| 27       | S         | CATL1_HUMAN      | 22       | 1        | "Cathepsin L1 OS=Homo sapiens OX=9606 GN=CTSL PE=1 SV=2"                                |
| 28       | N         | BAG52708.1       | 21       | 1        | "unnamed protein product [Homo sapiens]"                                                |
| 29       | N         | ADE73599.1       | 21       | 1        | "MHC class I antigen partial [Homo sapiens]"                                            |
| 30       | N         | EAX10114.1       | 20       | 1        | "chromosome 20 open reading frame 3 isoform CRA_b [Homo sapiens]"                       |
| 31       | S         | EPC1_HUMAN       | 19       | 1        | "Enhancer of polycomb homolog 1 OS=Homo sapiens OX=9606 GN=EPC1 PE=1 SV=1"              |
| <b>F</b> | <b>DB</b> | <b>Accession</b> | <b>S</b> | <b>N</b> | <b>M</b>                                                                                |
|          |           |                  |          |          | <b>S82-band 6-Description</b>                                                           |
| 1        | N         | CAA39142.1       | 1843     | 58       | "type I collagen partial [Homo sapiens]"                                                |
| 2        | N         | AAA51995.1       | 1518     | 50       | "alpha 1 (I) chain propeptide partial [Homo sapiens]"                                   |
| 3        | S         | CO3A1_HUMAN      | 411      | 10       | "Collagen alpha-1(III) chain OS=Homo sapiens OX=9606 GN=COL3A1 PE=1 SV=4"               |
| 4        | S         | APOE_HUMAN       | 298      | 9        | "Apolipoprotein E OS=Homo sapiens OX=9606 GN=APOE PE=1 SV=1"                            |
| 5        | N         | BAA01989.1       | 239      | 5        | "human non-muscle myosin heavy chain partial [Homo sapiens]"                            |
| 6        | S         | TPM4_HUMAN       | 215      | 7        | "Tropomyosin alpha-4 chain OS=Homo sapiens OX=9606 GN=TPM4 PE=1 SV=3"                   |
| 6        | N         | AAL84570.1       | 150      | 4        | "TPMsk3 partial [Homo sapiens]"                                                         |

|    |   |                |     |   |                                                                                                 |
|----|---|----------------|-----|---|-------------------------------------------------------------------------------------------------|
| 7  | N | NP_001158887.1 | 206 | 4 | "L-lactate dehydrogenase A chain isoform 4 [Homo sapiens]"                                      |
| 8  | S | CO6A1_HUMAN    | 201 | 6 | "Collagen alpha-1(VI) chain OS=Homo sapiens OX=9606 GN=COL6A1 PE=1 SV=3"                        |
| 9  | S | CO5A1_HUMAN    | 179 | 7 | "Collagen alpha-1(V) chain OS=Homo sapiens OX=9606 GN=COL5A1 PE=1 SV=3"                         |
| 9  | N | NP_001265003.1 | 155 | 6 | "collagen alpha-1(V) chain isoform 2 preproprotein [Homo sapiens]"                              |
| 10 | S | ALDOA_HUMAN    | 155 | 4 | "Fructose-bisphosphate aldolase A OS=Homo sapiens OX=9606 GN=ALDOA PE=1 SV=2"                   |
| 11 | S | LDHB_HUMAN     | 152 | 4 | "L-lactate dehydrogenase B chain OS=Homo sapiens OX=9606 GN=LDHB PE=1 SV=2"                     |
| 12 | S | IBP6_HUMAN     | 147 | 4 | "Insulin-like growth factor-binding protein 6 OS=Homo sapiens OX=9606 GN=IGFBP6 PE=1SV=1"       |
| 13 | S | CLUS_HUMAN     | 138 | 4 | "Clusterin OS=Homo sapiens OX=9606 GN=CLU PE=1 SV=1"                                            |
| 14 | S | IBP7_HUMAN     | 135 | 5 | "Insulin-like growth factor-binding protein 7 OS=Homo sapiens OX=9606 GN=IGFBP7 PE=1 SV=1"      |
| 15 | S | TIMP1_HUMAN    | 121 | 2 | "Metalloproteinase inhibitor 1 OS=Homo sapiens OX=9606 GN=TIMP1 PE=1 SV=1"                      |
| 16 | S | SODE_HUMAN     | 121 | 2 | "Extracellular superoxide dismutase [Cu-Zn] OS=Homo sapiens OX=9606 GN=SOD3 PE=1 SV=2"          |
| 17 | S | FBN1_HUMAN     | 116 | 4 | "Fibrillin-1 OS=Homo sapiens OX=9606 GN=FBN1 PE=1 SV=3"                                         |
| 18 | S | ALBU_HUMAN     | 94  | 3 | "Serum albumin OS=Homo sapiens OX=9606 GN=ALB PE=1 SV=2"                                        |
| 19 | N | BAG60757.1     | 93  | 2 | "unnamed protein product [Homo sapiens]"                                                        |
| 20 | S | STC1_HUMAN     | 88  | 1 | "Stanniocalcin-1 OS=Homo sapiens OX=9606 GN=STC1 PE=1 SV=1"                                     |
| 21 | S | VIME_HUMAN     | 87  | 2 | "Vimentin OS=Homo sapiens OX=9606 GN=VIM PE=1 SV=4"                                             |
| 22 | S | ITIH4_HUMAN    | 71  | 1 | "Inter-alpha-trypsin inhibitor heavy chain H4 OS=Homo sapiens OX=9606 GN=ITIH4 PE=1 SV=4"       |
| 23 | S | EXTL2_HUMAN    | 65  | 1 | "Exostosin-like 2 OS=Homo sapiens OX=9606 GN=EXTL2 PE=1 SV=1"                                   |
| 24 | S | HEMO_HUMAN     | 56  | 2 | "Hemopexin OS=Homo sapiens OX=9606 GN=HPX PE=1 SV=2"                                            |
| 25 | S | G3P_HUMAN      | 52  | 1 | "Glyceraldehyde-3-phosphate dehydrogenase OS=Homo sapiens OX=9606 GN=GAPDH PE=1 SV=3"           |
| 26 | S | CTHR1_HUMAN    | 49  | 1 | "Collagen triple helix repeat-containing protein 1 OS=Homo sapiens OX=9606 GN=CTHRC1 PE=1 SV=1" |
| 27 | S | RLA0L_HUMAN    | 48  | 1 | "60S acidic ribosomal protein P0-like OS=Homo sapiens OX=9606 GN=RPLP0P6 PE=5 SV=1"             |
| 28 | S | GXLT1_HUMAN    | 43  | 1 | "Glucoside xylosyltransferase 1 OS=Homo sapiens OX=9606 GN=GXYLT1 PE=1 SV=2"                    |



| N  |   |             |    |   |                                                                                   |
|----|---|-------------|----|---|-----------------------------------------------------------------------------------|
| 29 | N | AAH28145.1  | 38 | 1 | "THBS1 protein partial [Homo sapiens]"                                            |
| 30 | S | ALDOC_HUMAN | 38 | 1 | "Fructose-bisphosphate aldolase C OS=Homo sapiens OX=9606 GN=ALDOC PE=1 SV=2"     |
| 31 | S | FINC_HUMAN  | 37 | 1 | "Fibronectin OS=Homo sapiens OX=9606 GN=FN1 PE=1 SV=4"                            |
| 32 | N | SJM31191.1  | 37 | 1 | "Sulfotransferase [Homo sapiens]"                                                 |
| 33 | S | PAI1_HUMAN  | 35 | 1 | "Plasminogen activator inhibitor 1 OS=Homo sapiens OX=9606 GN=SERPINE1 PE=1 SV=1" |
| 34 | S | TRFE_HUMAN  | 33 | 1 | "Serotransferrin OS=Homo sapiens OX=9606 GN=TF PE=1 SV=3"                         |
| 35 | S | PRS23_HUMAN | 32 | 1 | "Serine protease 23 OS=Homo sapiens OX=9606 GN=PRSS23 PE=1 SV=1"                  |
| 36 | S | GTPB2_HUMAN | 21 | 1 | "GTP-binding protein 2 OS=Homo sapiens OX=9606 GN=GTPBP2 PE=1 SV=1"               |

LC-MS/MS: Liquid Chromatography Mass Spectrometry.

**Table S2.** Proteins extracted from 30 µg exosomes derived from the sample S-104 and identified by LC-MS/MS analyses.

| F | DB | Accession      | S    | N<br>M | S104-band 1-Description                                                  |
|---|----|----------------|------|--------|--------------------------------------------------------------------------|
| 1 | N  | NP_997647.1    | 1629 | 54     | "fibronectin isoform 1 precursor [Homo sapiens]"                         |
| 2 | S  | ALBU_HUMAN     | 294  | 14     | "Serum albumin OS=Homo sapiens OX=9606 GN=ALB PE=1 SV=2"                 |
| 3 | S  | A2MG_HUMAN     | 160  | 7      | "Alpha-2-macroglobulin OS=Homo sapiens OX=9606 GN=A2M PE=1 SV=3"         |
| 4 | S  | PGS1_HUMAN     | 157  | 6      | "Biglycan OS=Homo sapiens OX=9606 GN=BGN PE=1 SV=2"                      |
| 5 | N  | SJM31191.1     | 89   | 7      | "Sulfotransferase [Homo sapiens]"                                        |
| 6 | S  | TRFE_HUMAN     | 65   | 2      | "Serotransferrin OS=Homo sapiens OX=9606 GN=TF PE=1 SV=3"                |
| 7 | S  | CERU_HUMAN     | 43   | 1      | "Ceruloplasmin OS=Homo sapiens OX=9606 GN=CP PE=1 SV=1"                  |
| 8 | N  | SJM28737.1     | 40   | 1      | "Cytosine deaminase [Homo sapiens]"                                      |
| 9 | N  | EAW62750.1     | 19   | 1      | "hCG2041930 partial [Homo sapiens]"                                      |
| F | DB | Accession      | S    | N<br>M | S104-band 2-Description                                                  |
| 1 | S  | CO6A1_HUMAN    | 705  | 20     | "Collagen alpha-1(VI) chain OS=Homo sapiens OX=9606 GN=COL6A1 PE=1 SV=3" |
| 2 | N  | XP_005257115.2 | 509  | 16     | "collagen alpha-1(I) chain isoform X2 [Homo sapiens]"                    |
| 3 | S  | ALBU_HUMAN     | 198  | 8      | "Serum albumin OS=Homo sapiens OX=9606 GN=ALB PE=1 SV=2"                 |
| 4 | N  | NP_002017.1    | 164  | 9      | "fibronectin isoform 3 preproprotein [Homo sapiens]"                     |

|          |           |                  |          |                      |                                                                                                |
|----------|-----------|------------------|----------|----------------------|------------------------------------------------------------------------------------------------|
| 5        | N         | CAA23761.1       | 152      | 6                    | "unnamed protein product partial [Homo sapiens]"                                               |
| 6        | S         | PGS1_HUMAN       | 147      | 3                    | "Biglycan OS=Homo sapiens OX=9606 GN=BGN PE=1 SV=2"                                            |
| 7        | S         | A2MG_HUMAN       | 102      | 4                    | "Alpha-2-macroglobulin OS=Homo sapiens OX=9606 GN=A2M PE=1 SV=3"                               |
| 8        | S         | IPO5_HUMAN       | 75       | 1                    | "Importin-5 OS=Homo sapiens OX=9606 GN=IPO5 PE=1 SV=4"                                         |
| 9        | S         | TRFE_HUMAN       | 74       | 2                    | "Serotransferrin OS=Homo sapiens OX=9606 GN=TF PE=1 SV=3"                                      |
| 10       | S         | TLN1_HUMAN       | 70       | 1                    | "Talin-1 OS=Homo sapiens OX=9606 GN=TLN1 PE=1 SV=3"                                            |
| 11       | S         | PXDN_HUMAN       | 62       | 2                    | "Peroxidasin homolog OS=Homo sapiens OX=9606 GN=PXDN PE=1 SV=2"                                |
| 12       | S         | FLNA_HUMAN       | 58       | 1                    | "Filamin-A OS=Homo sapiens OX=9606 GN=FLNA PE=1 SV=4"                                          |
| 13       | S         | CO6A2_HUMAN      | 58       | 2                    | "Collagen alpha-2(VI) chain OS=Homo sapiens OX=9606 GN=COL6A2 PE=1 SV=4"                       |
| 14       | N         | EAW68718.1       | 52       | 2                    | "hemopexin isoform CRA_a [Homo sapiens]"                                                       |
| 15       | S         | VINC_HUMAN       | 42       | 1                    | "Vinculin OS=Homo sapiens OX=9606 GN=VCL PE=1 SV=4"                                            |
| 16       | N         | SJM31191.1       | 40       | 3                    | "Sulfotransferase [Homo sapiens]"                                                              |
| 17       | S         | STPG1_HUMAN      | 31       | 1                    | "O(6)-methylguanine-induced apoptosis 2 OS=Homo sapiens OX=9606 GN=STPG1 PE=1 SV=1"            |
| 18       | N         | CAE45795.1       | 25       | 1                    | "hypothetical protein partial [Homo sapiens]"                                                  |
| 19       | N         | AMZ80337.1       | 25       | 1                    | "SHLP2 [Homo sapiens]"                                                                         |
| 20       | N         | ADX66002.1       | 18       | 1                    | "immunoglobulin variable region partial [Homo sapiens]"                                        |
| <b>F</b> | <b>DB</b> | <b>Accession</b> | <b>S</b> | <b>N</b><br><b>M</b> | <b>S104-band 3-Description</b>                                                                 |
| 1        | S         | TRFE_HUMAN       | 649      | 26                   | "Serotransferrin OS=Homo sapiens OX=9606 GN=TF PE=1 SV=3"                                      |
| 2        | S         | ACTN1_HUMAN      | 355      | 10                   | "Alpha-actinin-1 OS=Homo sapiens OX=9606 GN=ACTN1 PE=1 SV=2"                                   |
| 3        | S         | LG3BP_HUMAN      | 315      | 16                   | "Galectin-3-binding protein OS=Homo sapiens OX=9606 GN=LGALS3BP PE=1 SV=1"                     |
| 4        | S         | ALBU_HUMAN       | 205      | 7                    | "Serum albumin OS=Homo sapiens OX=9606 GN=ALB PE=1 SV=2"                                       |
| 5        | S         | HS90A_HUMAN      | 176      | 8                    | "Heat shock protein HSP 90-alpha OS=Homo sapiens OX=9606 GN=HSP90AA1 PE=1 SV=5"                |
| 6        | N         | AAH49849.1       | 135      | 3                    | "MYH9 protein partial [Homo sapiens]"                                                          |
| 7        | S         | PLOD1_HUMAN      | 101      | 2                    | "Procollagen-lysine 2-oxoglutarate 5-dioxygenase 1 OS=Homo sapiens OX=9606 GN=PLOD1 PE=1 SV=2" |
| 8        | N         | AAC34741.1       | 88       | 2                    | "semaphorin L partial [Homo sapiens]"                                                          |
| 9        | S         | QSOX1_HUMAN      | 86       | 2                    | "Sulfhydryl oxidase 1 OS=Homo sapiens OX=9606 GN=QSOX1 PE=1 SV=3"                              |
| 10       | S         | PGS1_HUMAN       | 79       | 1                    | "Biglycan OS=Homo sapiens OX=9606 GN=BGN PE=1 SV=2"                                            |

|          |           |                  |          |          |                                                                                                |
|----------|-----------|------------------|----------|----------|------------------------------------------------------------------------------------------------|
| 11       | N         | BAG36698.1       | 68       | 1        | "unnamed protein product [Homo sapiens]"                                                       |
| 12       | S         | PLTP_HUMAN       | 60       | 1        | "Phospholipid transfer protein OS=Homo sapiens OX=9606 GN=PLTP PE=1 SV=1"                      |
| 13       | N         | SJM31191.1       | 53       | 3        | "Sulfotransferase [Homo sapiens]"                                                              |
| 14       | S         | FETA_HUMAN       | 48       | 2        | "Alpha-fetoprotein OS=Homo sapiens OX=9606 GN=AFP PE=1 SV=1"                                   |
| 15       | N         | CAA23761.1       | 43       | 1        | "unnamed protein product partial [Homo sapiens]"                                               |
| 16       | S         | EF2_HUMAN        | 43       | 2        | "Elongation factor 2 OS=Homo sapiens OX=9606 GN=EEF2 PE=1 SV=4"                                |
| 17       | N         | BAH12513.1       | 39       | 1        | "unnamed protein product [Homo sapiens]"                                                       |
| 18       | N         | AAF40160.1       | 36       | 1        | "immunoglobulin heavy chain variable region 194-92 partial [Homo sapiens]"                     |
| 19       | S         | TRFL_HUMAN       | 33       | 1        | "Lactotransferrin OS=Homo sapiens OX=9606 GN=LTF PE=1 SV=6"                                    |
| 20       | N         | CAD38944.1       | 31       | 1        | "hypothetical protein partial [Homo sapiens]"                                                  |
| 21       | S         | KMT2A_HUMAN      | 26       | 1        | "Histone-lysine N-methyltransferase 2A OS=Homo sapiens OX=9606 GN=KMT2A PE=1 SV=5"             |
| 22       | S         | MMP2_HUMAN       | 22       | 1        | "72 kDa type IV collagenase OS=Homo sapiens OX=9606 GN=MMP2 PE=1 SV=2"                         |
| 23       | N         | XP_011507815.3   | 21       | 1        | "transport and Golgi organization protein 1 homolog isoform X3 [Homo sapiens]"                 |
| <b>F</b> | <b>DB</b> | <b>Accession</b> | <b>S</b> | <b>N</b> | <b>S104-band 4-Description</b>                                                                 |
| 1        | S         | ALBU_HUMAN       | 422      | 21       | "Serum albumin OS=Homo sapiens OX=9606 GN=ALB PE=1 SV=2"                                       |
| 1        | N         | CAA23753.1       | 142      | 13       | "unnamed protein product [Homo sapiens]"                                                       |
| 2        | S         | TRFE_HUMAN       | 113      | 4        | "Serotransferrin OS=Homo sapiens OX=9606 GN=TF PE=1 SV=3"                                      |
| 3        | N         | SJM31191.1       | 63       | 5        | "Sulfotransferase [Homo sapiens]"                                                              |
| 4        | N         | AAC08449.1       | 56       | 2        | "BIGH3 partial [Homo sapiens]"                                                                 |
| 5        | N         | CAD62334.1       | 50       | 1        | "unnamed protein product partial [Homo sapiens]"                                               |
| 6        | S         | HEMO_HUMAN       | 41       | 1        | "Hemopexin OS=Homo sapiens OX=9606 GN=HPX PE=1 SV=2"                                           |
| 7        | N         | CAD38944.1       | 40       | 1        | "hypothetical protein partial [Homo sapiens]"                                                  |
| 8        | N         | AKD42826.1       | 37       | 2        | "anti-HIV-1 immunoglobulin light chain variable region partial [Homo sapiens]"                 |
| 9        | S         | MCPH1_HUMAN      | 30       | 1        | "Microcephalin OS=Homo sapiens OX=9606 GN=MCPH1 PE=1 SV=4"                                     |
| 10       | S         | MMP2_HUMAN       | 28       | 1        | "72 kDa type IV collagenase OS=Homo sapiens OX=9606 GN=MMP2 PE=1 SV=2"                         |
| 11       | N         | AAH38117.1       | 25       | 1        | "LAPTM4B protein [Homo sapiens]"                                                               |
| 12       | S         | CAD23_HUMAN      | 24       | 1        | "Cadherin-23 OS=Homo sapiens OX=9606 GN=CDH23 PE=1 SV=2"                                       |
| 13       | N         | BAA91591.1       | 18       | 1        | "unnamed protein product partial [Homo sapiens]"                                               |
| 14       | S         | LRP2_HUMAN       | 14       | 1        | "Low-density lipoprotein receptor-related protein 2 OS=Homo sapiens OX=9606 GN=LRP2 PE=1 SV=3" |
| <b>F</b> | <b>DB</b> | <b>Accession</b> | <b>S</b> | <b>N</b> | <b>S104-band 5-Description</b>                                                                 |

|                                |           |                  |          |          | M                                                                                                             |
|--------------------------------|-----------|------------------|----------|----------|---------------------------------------------------------------------------------------------------------------|
| 1                              | S         | PAI1_HUMAN       | 678      | 24       | "Plasminogen activator inhibitor 1 OS=Homo sapiens OX=9606 GN=SERPINE1 PE=1 SV=1"                             |
| 2                              | N         | BAG62914.1       | 236      | 9        | "unnamed protein product [Homo sapiens]"                                                                      |
| 3                              | S         | ALBU_HUMAN       | 209      | 13       | "Serum albumin OS=Homo sapiens OX=9606 GN=ALB PE=1 SV=2"                                                      |
| 4                              | S         | VIME_HUMAN       | 180      | 8        | "Vimentin OS=Homo sapiens OX=9606 GN=VIM PE=1 SV=4"                                                           |
| 5                              | S         | SPRC_HUMAN       | 119      | 5        | "SPARC OS=Homo sapiens OX=9606 GN=SPARC PE=1 SV=1"                                                            |
| 6                              | S         | TRFE_HUMAN       | 98       | 5        | "Serotransferrin OS=Homo sapiens OX=9606 GN=TF PE=1 SV=3"                                                     |
| 7                              | N         | EAW68718.1       | 72       | 2        | "hemopexin isoform CRA a [Homo sapiens]"                                                                      |
| 8                              | S         | CO6A1_HUMAN      | 61       | 1        | "Collagen alpha-1(VI) chain OS=Homo sapiens OX=9606 GN=COL6A1 PE=1 SV=3"                                      |
| 9                              | S         | MMP1_HUMAN       | 60       | 1        | "Interstitial collagenase OS=Homo sapiens OX=9606 GN=MMP1 PE=1 SV=3"                                          |
| 10                             | S         | CLC11_HUMAN      | 47       | 1        | "C-type lectin domain family 11 member A OS=Homo sapiens OX=9606 GN=CLEC11A PE=1 SV=1"                        |
| 11                             | S         | FSTL1_HUMAN      | 43       | 1        | "Follistatin-related protein 1 OS=Homo sapiens OX=9606 GN=FSTL1 PE=1 SV=1"                                    |
| 12                             | S         | PTX3_HUMAN       | 39       | 1        | "Pentraxin-related protein PTX3 OS=Homo sapiens OX=9606 GN=PTX3 PE=1 SV=3"                                    |
| 13                             | N         | SJM31191.1       | 39       | 2        | "Sulfotransferase [Homo sapiens]"                                                                             |
| 14                             | S         | ANT3_HUMAN       | 37       | 1        | "Antithrombin-III OS=Homo sapiens OX=9606 GN=SERPINC1 PE=1 SV=1"                                              |
| 15                             | S         | ISLR_HUMAN       | 34       | 1        | "Immunoglobulin superfamily containing leucine-rich repeat protein OS=Homo sapiens OX=9606 GN=ISLR PE=2 SV=1" |
| 16                             | N         | CAD38944.1       | 26       | 1        | "hypothetical protein partial [Homo sapiens]"                                                                 |
| 17                             | N         | AAH38117.1       | 25       | 1        | "LAPTM4B protein [Homo sapiens]"                                                                              |
| 18                             | S         | TBA1B_HUMAN      | 25       | 1        | "Tubulin alpha-1B chain OS=Homo sapiens OX=9606 GN=TUBA1B PE=1 SV=1"                                          |
| 19                             | S         | ZC3H6_HUMAN      | 18       | 1        | "Zinc finger CCCH domain-containing protein 6 OS=Homo sapiens OX=9606 GN=ZC3H6 PE=1 SV=2"                     |
| <b>F</b>                       | <b>DB</b> | <b>Accession</b> | <b>S</b> | <b>N</b> | <b>M</b>                                                                                                      |
| <b>S104-band 6-Description</b> |           |                  |          |          |                                                                                                               |
| 1                              | N         | AAA51995.1       | 378      | 11       | "alpha 1 (I) chain propeptide partial [Homo sapiens]"                                                         |
| 2                              | S         | ALBU_HUMAN       | 207      | 10       | "Serum albumin OS=Homo sapiens OX=9606 GN=ALB PE=1 SV=2"                                                      |
| 2                              | N         | CAA23753.1       | 120      | 9        | "unnamed protein product [Homo sapiens]"                                                                      |
| 3                              | N         | BAG36698.1       | 177      | 5        | "unnamed protein product [Homo sapiens]"                                                                      |
| 4                              | S         | LDHA_HUMAN       | 164      | 4        | "L-lactate dehydrogenase A chain OS=Homo sapiens OX=9606 GN=LDHA PE=1 SV=2"                                   |
| 5                              | S         | CO1A2_HUMAN      | 137      | 6        | "Collagen alpha-2(I) chain OS=Homo sapiens OX=9606 GN=COL1A2 PE=1 SV=7"                                       |

|    |   |             |     |   |                                                                                            |
|----|---|-------------|-----|---|--------------------------------------------------------------------------------------------|
| 6  | S | APOA1_HUMAN | 117 | 2 | "Apolipoprotein A-I OS=Homo sapiens OX=9606 GN=APOA1 PE=1 SV=1"                            |
| 7  | S | PSA2_HUMAN  | 103 | 2 | "Proteasome subunit alpha type-2 OS=Homo sapiens OX=9606 GN=PSMA2 PE=1 SV=2"               |
| 8  | S | TPM4_HUMAN  | 98  | 2 | "Tropomyosin alpha-4 chain OS=Homo sapiens OX=9606 GN=TPM4 PE=1 SV=3"                      |
| 9  | S | 1433B_HUMAN | 95  | 1 | "14-3-3 protein beta/alpha OS=Homo sapiens OX=9606 GN=YWHAB PE=1 SV=3"                     |
| 10 | S | PSA3_HUMAN  | 90  | 1 | "Proteasome subunit alpha type-3 OS=Homo sapiens OX=9606 GN=PSMA3 PE=1 SV=2"               |
| 11 | N | BAG60361.1  | 90  | 1 | "unnamed protein product [Homo sapiens]"                                                   |
| 12 | S | 1433Z_HUMAN | 88  | 1 | "14-3-3 protein zeta/delta OS=Homo sapiens OX=9606 GN=YWHAZ PE=1 SV=1"                     |
| 13 | S | TIMP1_HUMAN | 86  | 1 | "Metalloproteinase inhibitor 1 OS=Homo sapiens OX=9606 GN=TIMP1 PE=1 SV=1"                 |
| 14 | S | LDHB_HUMAN  | 76  | 2 | "L-lactate dehydrogenase B chain OS=Homo sapiens OX=9606 GN=LDHB PE=1 SV=2"                |
| 15 | S | ACTBL_HUMAN | 71  | 1 | "Beta-actin-like protein 2 OS=Homo sapiens OX=9606 GN=ACTBL2 PE=1 SV=2"                    |
| 16 | S | IBP7_HUMAN  | 68  | 2 | "Insulin-like growth factor-binding protein 7 OS=Homo sapiens OX=9606 GN=IGFBP7 PE=1 SV=1" |
| 17 | S | TRFE_HUMAN  | 67  | 2 | "Serotransferrin OS=Homo sapiens OX=9606 GN=TF PE=1 SV=3"                                  |
| 18 | S | CLIC1_HUMAN | 66  | 1 | "Chloride intracellular channel protein 1 OS=Homo sapiens OX=9606 GN=CLIC1 PE=1 SV=4"      |
| 19 | S | FBN1_HUMAN  | 63  | 1 | "Fibrillin-1 OS=Homo sapiens OX=9606 GN=FBN1 PE=1 SV=3"                                    |
| 20 | S | K1C10_HUMAN | 59  | 1 | "Keratin type I cytoskeletal 10 OS=Homo sapiens OX=9606 GN=KRT10 PE=1 SV=6"                |
| 21 | S | PSA7_HUMAN  | 56  | 2 | "Proteasome subunit alpha type-7 OS=Homo sapiens OX=9606 GN=PSMA7 PE=1 SV=1"               |
| 22 | S | G3P_HUMAN   | 55  | 1 | "Glyceraldehyde-3-phosphate dehydrogenase OS=Homo sapiens OX=9606 GN=GAPDH PE=1 SV=3"      |
| 23 | N | SJM31191.1  | 54  | 4 | "Sulfotransferase [Homo sapiens]"                                                          |
| 24 | S | PSA4_HUMAN  | 46  | 2 | "Proteasome subunit alpha type-4 OS=Homo sapiens OX=9606 GN=PSMA4 PE=1 SV=1"               |
| 25 | S | TPIS_HUMAN  | 42  | 1 | "Triosephosphate isomerase OS=Homo sapiens OX=9606 GN=TPI1 PE=1 SV=3"                      |
| 26 | S | HEMO_HUMAN  | 38  | 1 | "Hemopexin OS=Homo sapiens OX=9606 GN=HPX PE=1 SV=2"                                       |
| 27 | S | PSA1_HUMAN  | 34  | 1 | "Proteasome subunit alpha type-1 OS=Homo sapiens OX=9606 GN=PSMA1 PE=1 SV=1"               |
| 28 | N | CAD38944.1  | 33  | 1 | "hypothetical protein partial [Homo sapiens]"                                              |
| 29 | S | TBA1B_HUMAN | 32  | 1 | "Tubulin alpha-1B chain OS=Homo sapiens OX=9606 GN=TUBA1B PE=1 SV=1"                       |
| 30 | S | RLA0L_HUMAN | 32  | 1 | "60S acidic ribosomal protein P0-like OS=Homo sapiens OX=9606 GN=RPLP0P6 PE=5 SV=1"        |

---

|                 |   |                |    |   |                                                                                  |
|-----------------|---|----------------|----|---|----------------------------------------------------------------------------------|
| 31              | N | 1IRU_E         | 32 | 1 | "Chain E Crystal Structure Of The Mammalian 20s Proteasome At 2.75 A Resolution" |
| 32              | S | IGKC_HUMA<br>N | 29 | 1 | "Immunoglobulin kappa constant OS=Homo sapiens OX=9606 GN=IGKC PE=1 SV=2"        |
| <sup>1</sup> 33 | N | AAH21119.1     | 26 | 1 | "GAPVD1 protein [Homo sapiens]"                                                  |

---

<sup>1</sup> LC-MS/MS: Liquid Chromatography Mass Spectrometry.
